# Supplementary material for: Intrinsic proton transfer activation of l-DOPA encoded carbonic anhydrase for efficient CO2 sequestration
Source: Royal Society of Chemistry journal article supplement (doi:10.1039/d5cp00868a), 2025-01-01
Supplement: d5cp00868a1.pdf [file d5cp00868a1.pdf]

## **Intrinsic Proton Transfer Activation of L-DOPA Encoded Carbonic Anhydrase for Efficient CO<sub>2</sub> Sequestration.**

Ashokraj Sundarapandian,<sup>a,b</sup> Prem Suresh,<sup>a,b</sup> Sisila Valappil<sup>a</sup>, and Ayyadurai Niraikulam<sup>\* a</sup>

a - Division of Biochemistry and Biotechnology, Council of Scientific and Industrial Research

- Central Leather Research Institute, Chennai, India.

b - Academy of Scientific and Innovative Research (AcSIR), Ghaziabad, India.

\* Corresponding Author: Ayyadurai Niraikulam; [ayyadurai@clri.res.in](mailto:ayyadurai@clri.res.in)

### **Supporting Information**

#### **Table of Contents:**

|   |                                |    |
|---|--------------------------------|----|
| 1 | Scheme S1 - Graphical Abstract | S2 |
| 2 | Results and Discussion         | S2 |

## 1. Graphical Abstract

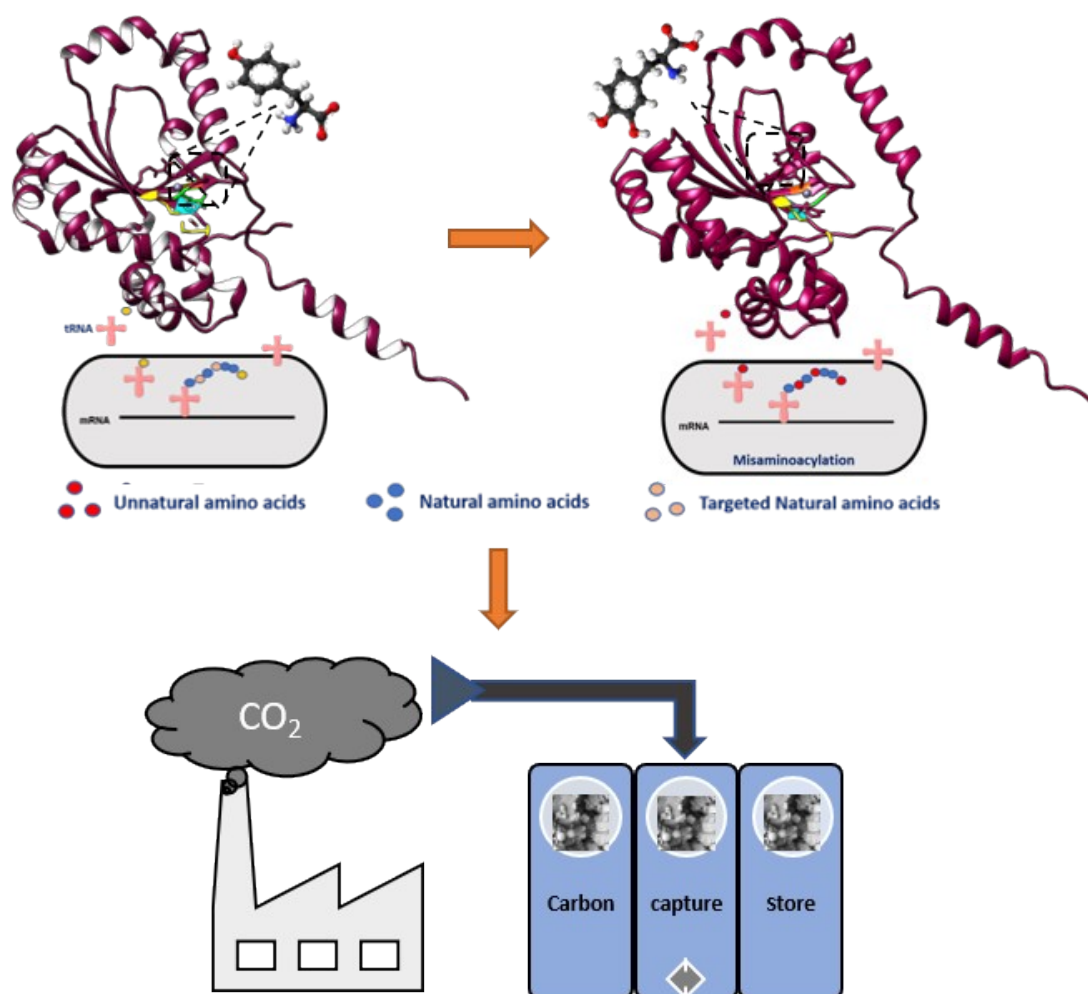

**Scheme 1.** Graphical abstract of L-DOPA encoded carbonic anhydrase through genetic code expansion method for CO<sub>2</sub> sequestration.

## 2. Results and Discussion

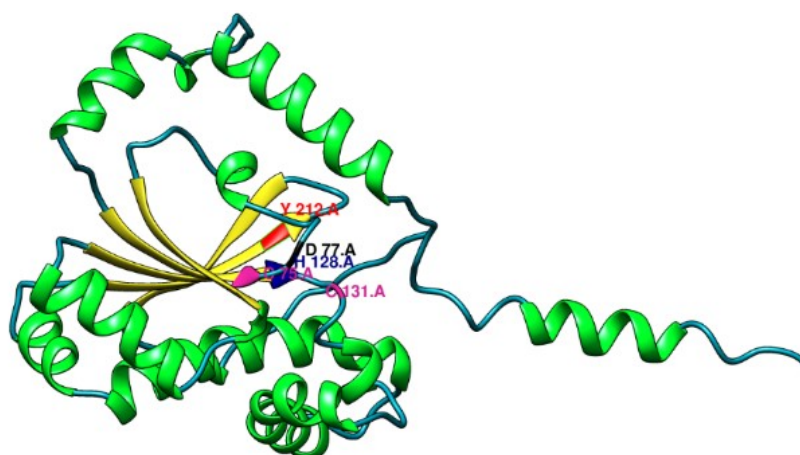

**Fig. S1** Alphafold2 Predicted structure of CA visualized in UCSF Chimera v 1.18

The presence of DOPA (DAH) at 212 position (instead of tyrosine) is hypothesized to enhance enzymatic activity by improving proton transfer efficiency and stabilizing interactions within the active site cleft, particularly through its ability to facilitate hydrogen bonding and hydrophilic interactions.

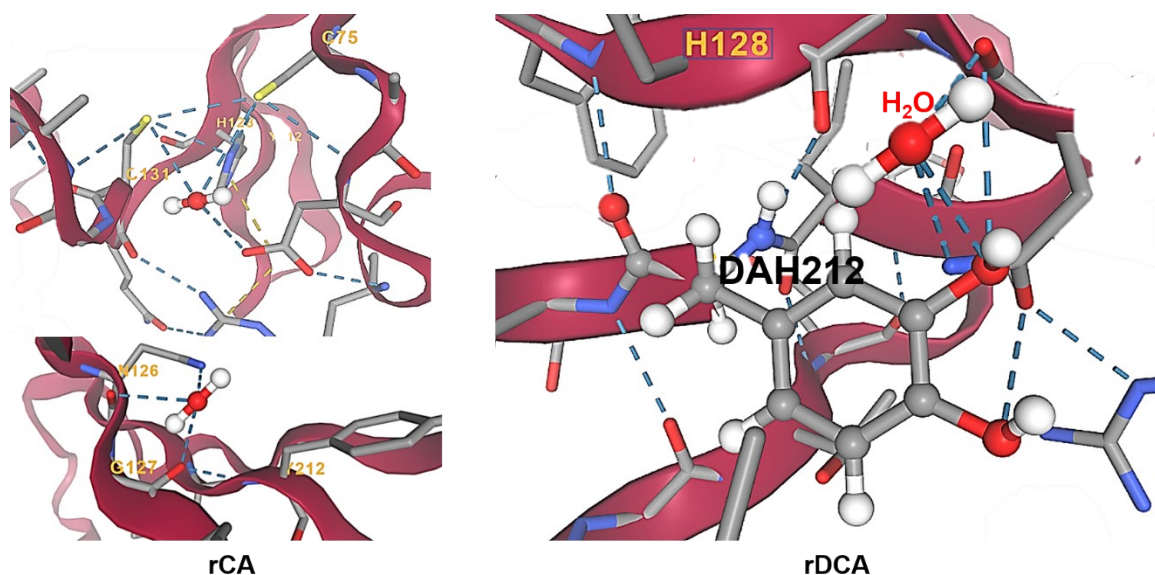

**Fig. S2** Molecular interaction prediction between active site and cleft residues with water molecule through SwissDock – Autodock vina. Calculated affinity of water molecule with rCA and rDCA is -1.01 kcal/mol and -1.35 kcal/mol respectively.

The congener DOPA encoded CA enzymes (rDCA) were purified using Ni-NTA affinity column and desalted using G25 Sephadex column chromatography in AKTA FPLC system. The desalted enzymes were concentrated and observed at ~28 kDa on SDS-PAGE. In NBT, the positive control L-DOPA (lane 1) and activator-incorporated CA (rDCA) (lane 2) showed a purple spot during NBT staining (Fig. S3), indicating the presence of quinone substances that catalyze redox cycling at alkaline pH 10 with glycine in NBT as a reductant.

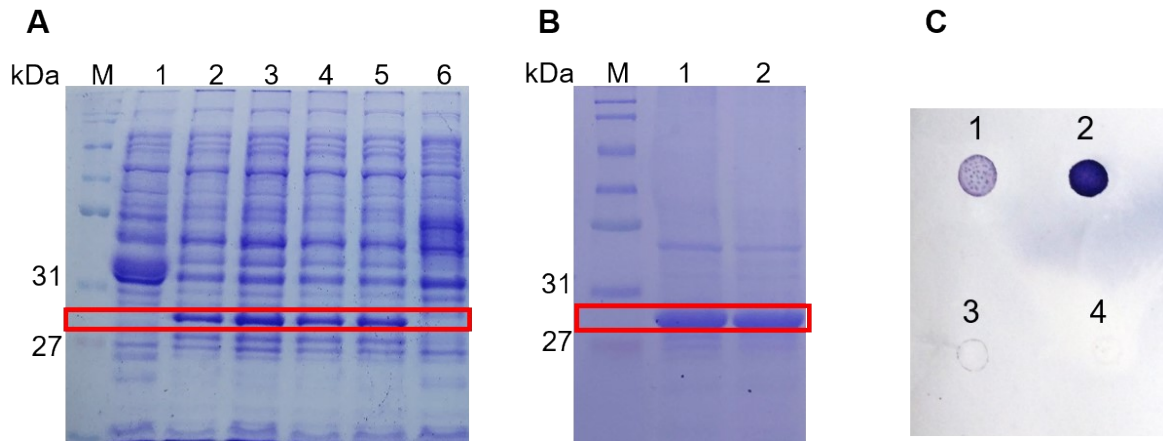

**Fig. S3** (A) Expression of rCA and rDCA. (B) Purified rCA and rDCA. (C) Confirmation of DOPA by NBT staining.

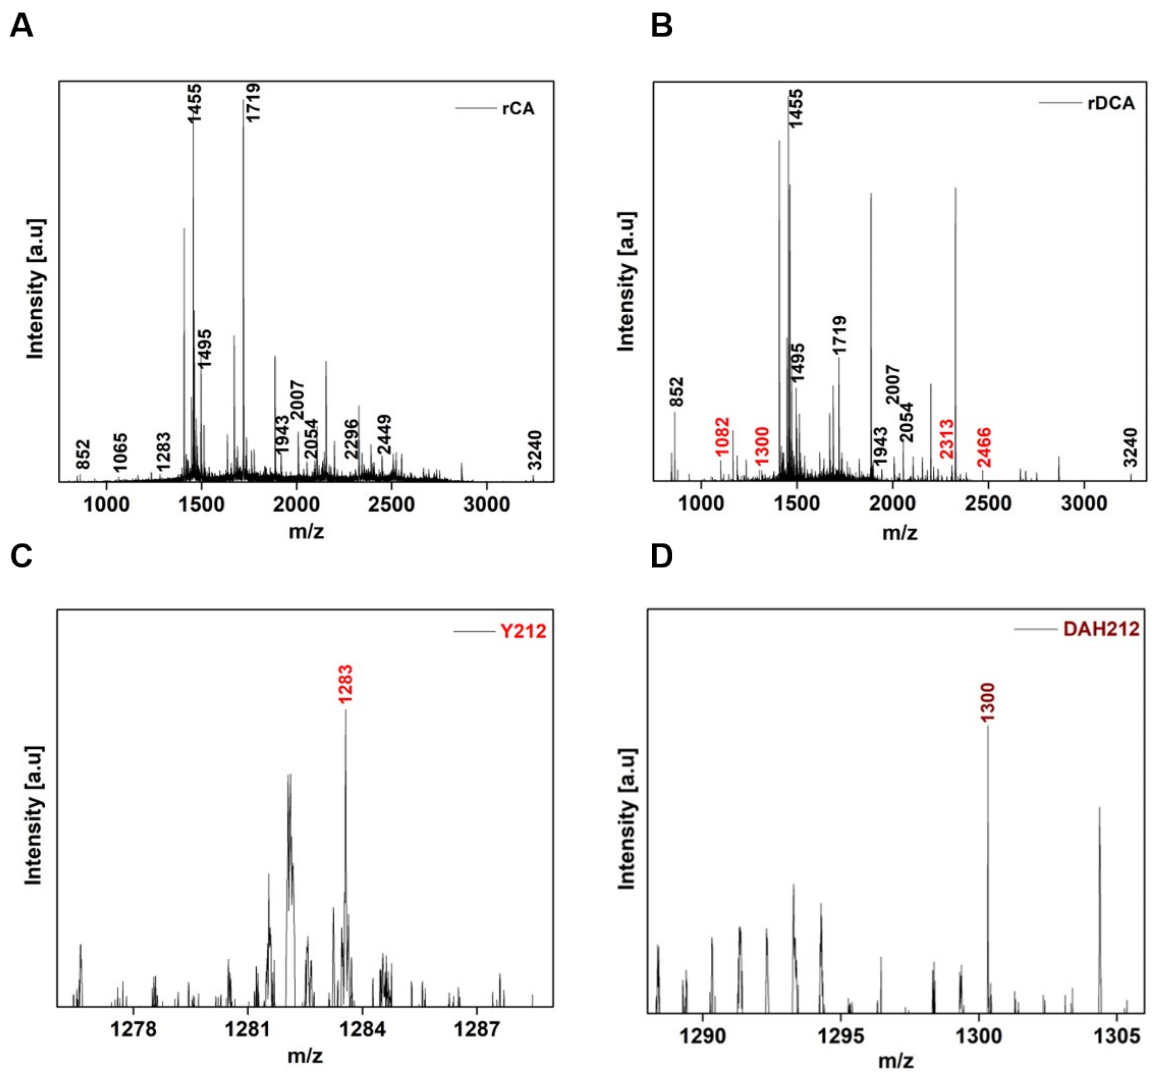

**Fig. S4** Confirmation of DOPA incorporation in CA from tryptic digested rCA and rDCA peptides through MALDI-ToF-ToF. (A) Mass of ingel digested rCA peptides. (B) Mass of ingel digested rDCA peptides. (C) Peptide mass containing tyrosine at 212<sup>th</sup> position in rCA. (D) Peptide mass containing DOPA replace tyrosine at 212<sup>th</sup> position in rDCA.

### Enzyme activity assay

$$CA \text{ Activity } (W - A \text{ Units}) = \frac{T_b - T_s}{T_s} * d.f \frac{U}{mg} \quad (1)$$

Where  $T_b$  and  $T_s$  refer to the time taken for the blank and sample to reach stationary phase at  $OD_{430}$  respectively, d.f represents the dilution factor used in the assay reaction. This activity was estimated for all the samples including rCA, rDCA, and both with an external activator L-DOPA.

$$\text{Turnover number } (K_{cat}) = \frac{V_{max}}{[E]_o} \quad (2)$$

$$\text{Catalytic efficiency} = \frac{K_{cat}}{K_m} \quad (3)$$

Where,  $[E]_o$  is the total enzyme concentration in the reaction mixture;  $K_{cat}$  is the turnover number of the enzyme and  $K_m$  is the michaelis constant (Enzyme – Substrate binding affinity).

**Table S1.** Modified activity assay of rCA and rDCA using time course measurement in UV spectroscopy.

| Samples | Average Time (seconds) | Activity (U/mg) |
|---------|------------------------|-----------------|
| Blank   | 64                     | -               |
| rCA     | 25                     | 78              |
| rDCA    | 12                     | 217             |

## Enzyme kinetics

The observed tripling of enzymatic activity can be attributed to alterations in the microenvironment within the enzyme's active site cleft. The results suggest that the additional hydroxyl group introduced into the active site interacts with water molecules, thereby enhancing the rate of proton transfer. To further validate this enhancement, L-DOPA was externally added as an activator to the unmodified enzyme, and its kinetics were compared with the genetically encoded L-DOPA variant of recombinant carbonic anhydrase (rDCA). The rDCA variant exhibited superior enzymatic activity compared to the unmodified CA enzyme, both in the presence and absence of external L-DOPA activation. The comparative kinetics were carried out using rCA, rDCA, and rCA with an external activator (rCA + DOPA) to determine the efficiency of the enzyme-bound activator as well as the external activator.

**Table S2.** Kinetic parameters for DOPA incorporated CA, without incorporated CA, and with external activators respectively. Enzyme concentration used in the reaction for all the samples was  $3.8 \times 10^{-4}$  mM, DOPA concentration was 20  $\mu$ M used.

| Samples     | $V_{\max}$ (W-A Units) | $K_m$ (mM) | $K_{\text{cat}}$ ( $\text{S}^{-1}$ ) | $K_{\text{cat}}/K_m$ ( $\text{mM}^{-1} \text{S}^{-1}$ ) |
|-------------|------------------------|------------|--------------------------------------|---------------------------------------------------------|
| rDCA        | 370                    | 20         | $9.6 \times 10^5$                    | $4.8 \times 10^4$                                       |
| rDCA + DOPA | 166                    | 33         | $2.1 \times 10^5$                    | $0.65 \times 10^4$                                      |
| rCA         | 181                    | 40         | $1.84 \times 10^5$                   | $0.69 \times 10^4$                                      |
| rCA + DOPA  | 108                    | 40         | $4.7 \times 10^5$                    | $1.1 \times 10^4$                                       |

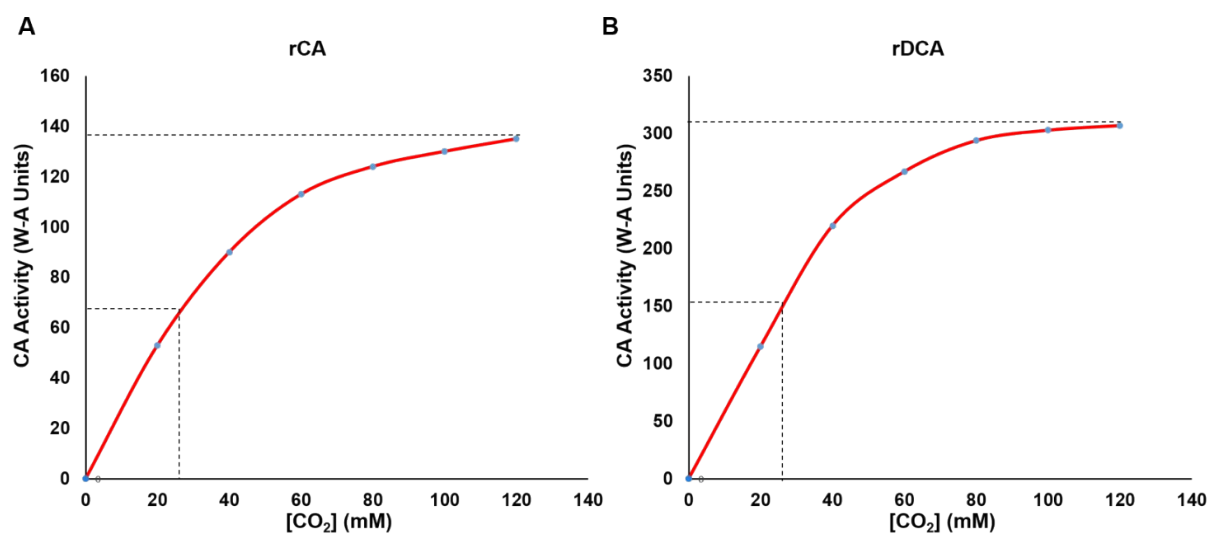

**Fig. S5** Michaelis – Menten kinetics for enzyme (A) rCA and (B) rDCA.

**Table S3.** Statistic summary of Lineweaver-Burk Plot kinetics plotted using both origin and graphpad prism software.

| Statistics Summary      | rCA         | rDCA       |
|-------------------------|-------------|------------|
| Reduced Chi-Sqr         | 2.48979E-10 | 1.94934E-9 |
| Adj. R-Square           | 0.99409     | 0.9858     |
| Max. no of Y replicates | 3           | 3          |
| P Value                 | <0.0001     | <0.0001    |
| Fit Status              | Succeeded   | Succeeded  |

### Thermostability assay

Residual activity (%) was calculated to check the temperature stability of the enzyme by the ratio of CA activity of heated samples ( $A_h$ ) to the activity of unheated samples ( $A_{uh}$ ) and converted into percentage. Furthermore, residual activity analysis revealed that rDCA maintained 100% of its activity in the temperature range of 95-110°C, whereas rCA exhibited a substantial reduction in residual activity under the same conditions

$$\text{Residual activity \%} = \frac{A_h}{A_{uh}} * 100 \quad (4)$$

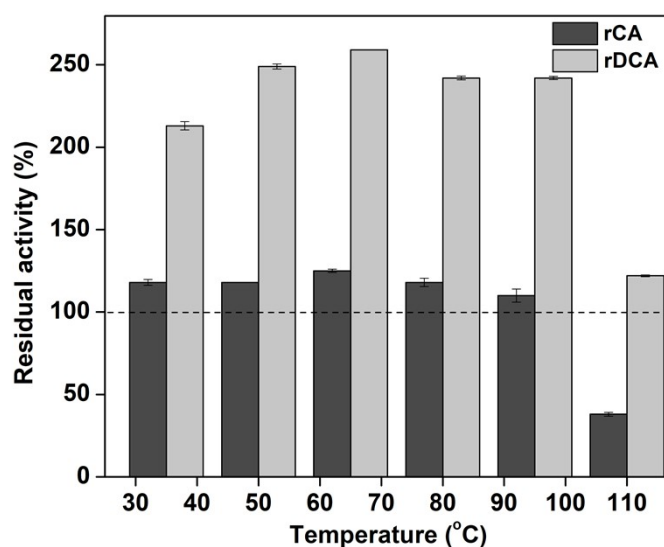

**Fig. S6** Short-term thermal stability through residual activity assay for rCA and rDCA

**Table S4.** Summary of mean relative activity and 95% confidence intervals for both rCA and rDCA enzymes

| Temperature(°C) | rCA Mean | rCA CI (95%)  | rDCA Mean | rDCA CI (95%) |
|-----------------|----------|---------------|-----------|---------------|
| 35              | 94.67    | 93.23 – 96.1  | 90.00     | 87.52 – 92.48 |
| 50              | 94.67    | 93.23 – 96.1  | 95.67     | 94.23 – 97.1  |
| 65              | 99.67    | 98.23–101.1   | 99.67     | 98.23 – 101.1 |
| 80              | 94.33    | 92.90 – 95.77 | 94.67     | 93.23 – 96.1  |
| 95              | 87.67    | 78.94 – 96.39 | 94.33     | 90.54 – 98.13 |
| 110             | 29.33    | 26.46 – 32.2  | 47.67     | 43.87 – 51.46 |



## CO<sub>2</sub> Sequestration and its confirmation

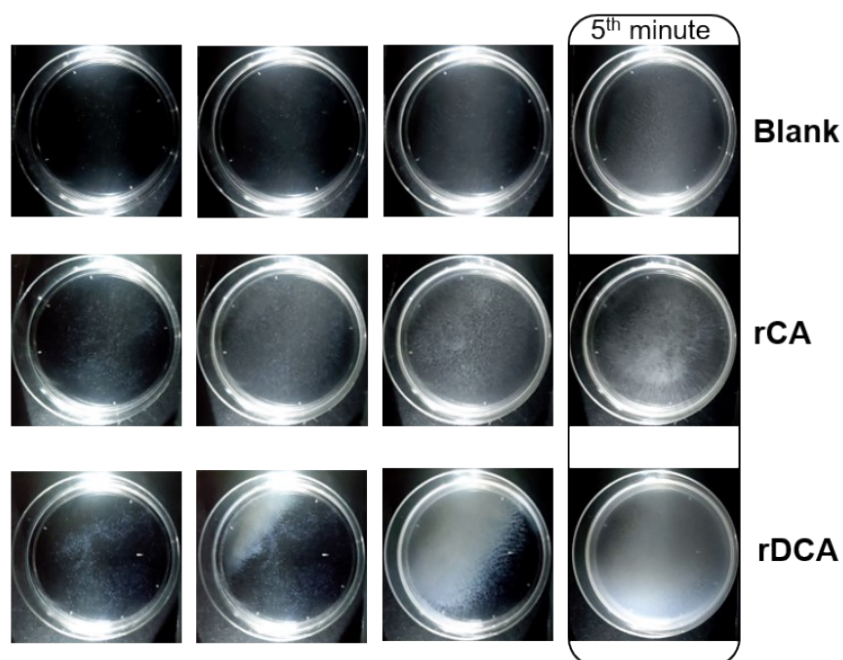

**Fig. S7** Video snap of CaCO<sub>3</sub> formation inside CO<sub>2</sub> incubator for 5 minutes.

CO<sub>2</sub> sequestration ability of the congener enzyme (rDCA) was examined by detecting the formation of CaCO<sub>3</sub> in the reaction mixture containing CaCl<sub>2</sub>. CaCO<sub>3</sub> also visualized in Energy Dispersive X-ray Analysis (EDX) shown in figure S7.

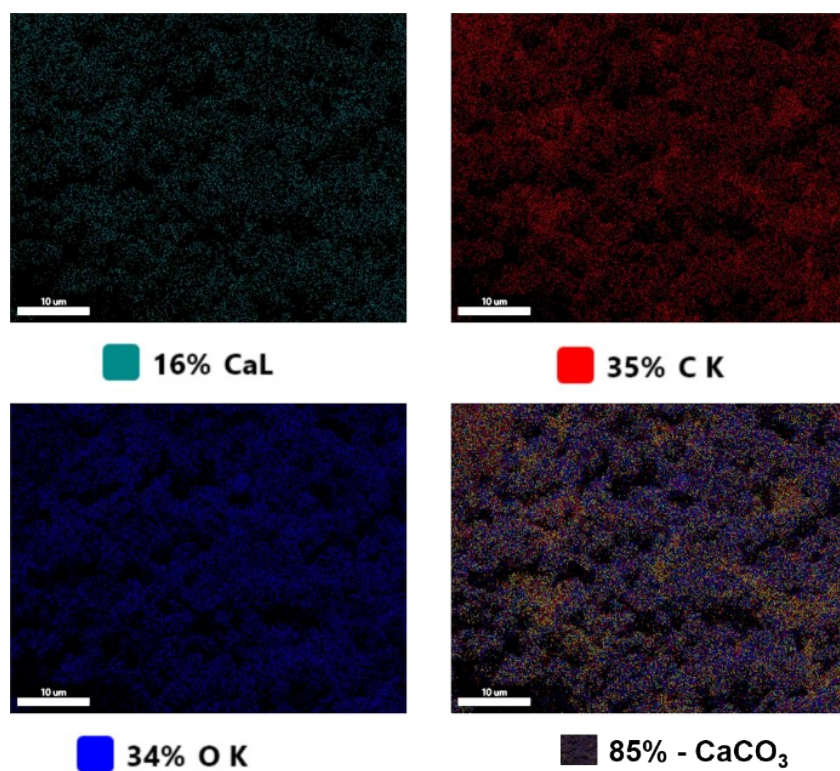

**Fig. S8** Energy dispersive X-ray analysis (EDX) result of calcium carbonate formation through carbon capture using rDCA enzyme.
